# Supplementary material for: Out of (the) bag—encoding categorical predictors impacts out-of-bag samples
Source: PeerJ journal article supplement (doi:10.7717/peerj-cs.2445), 2024-11-18

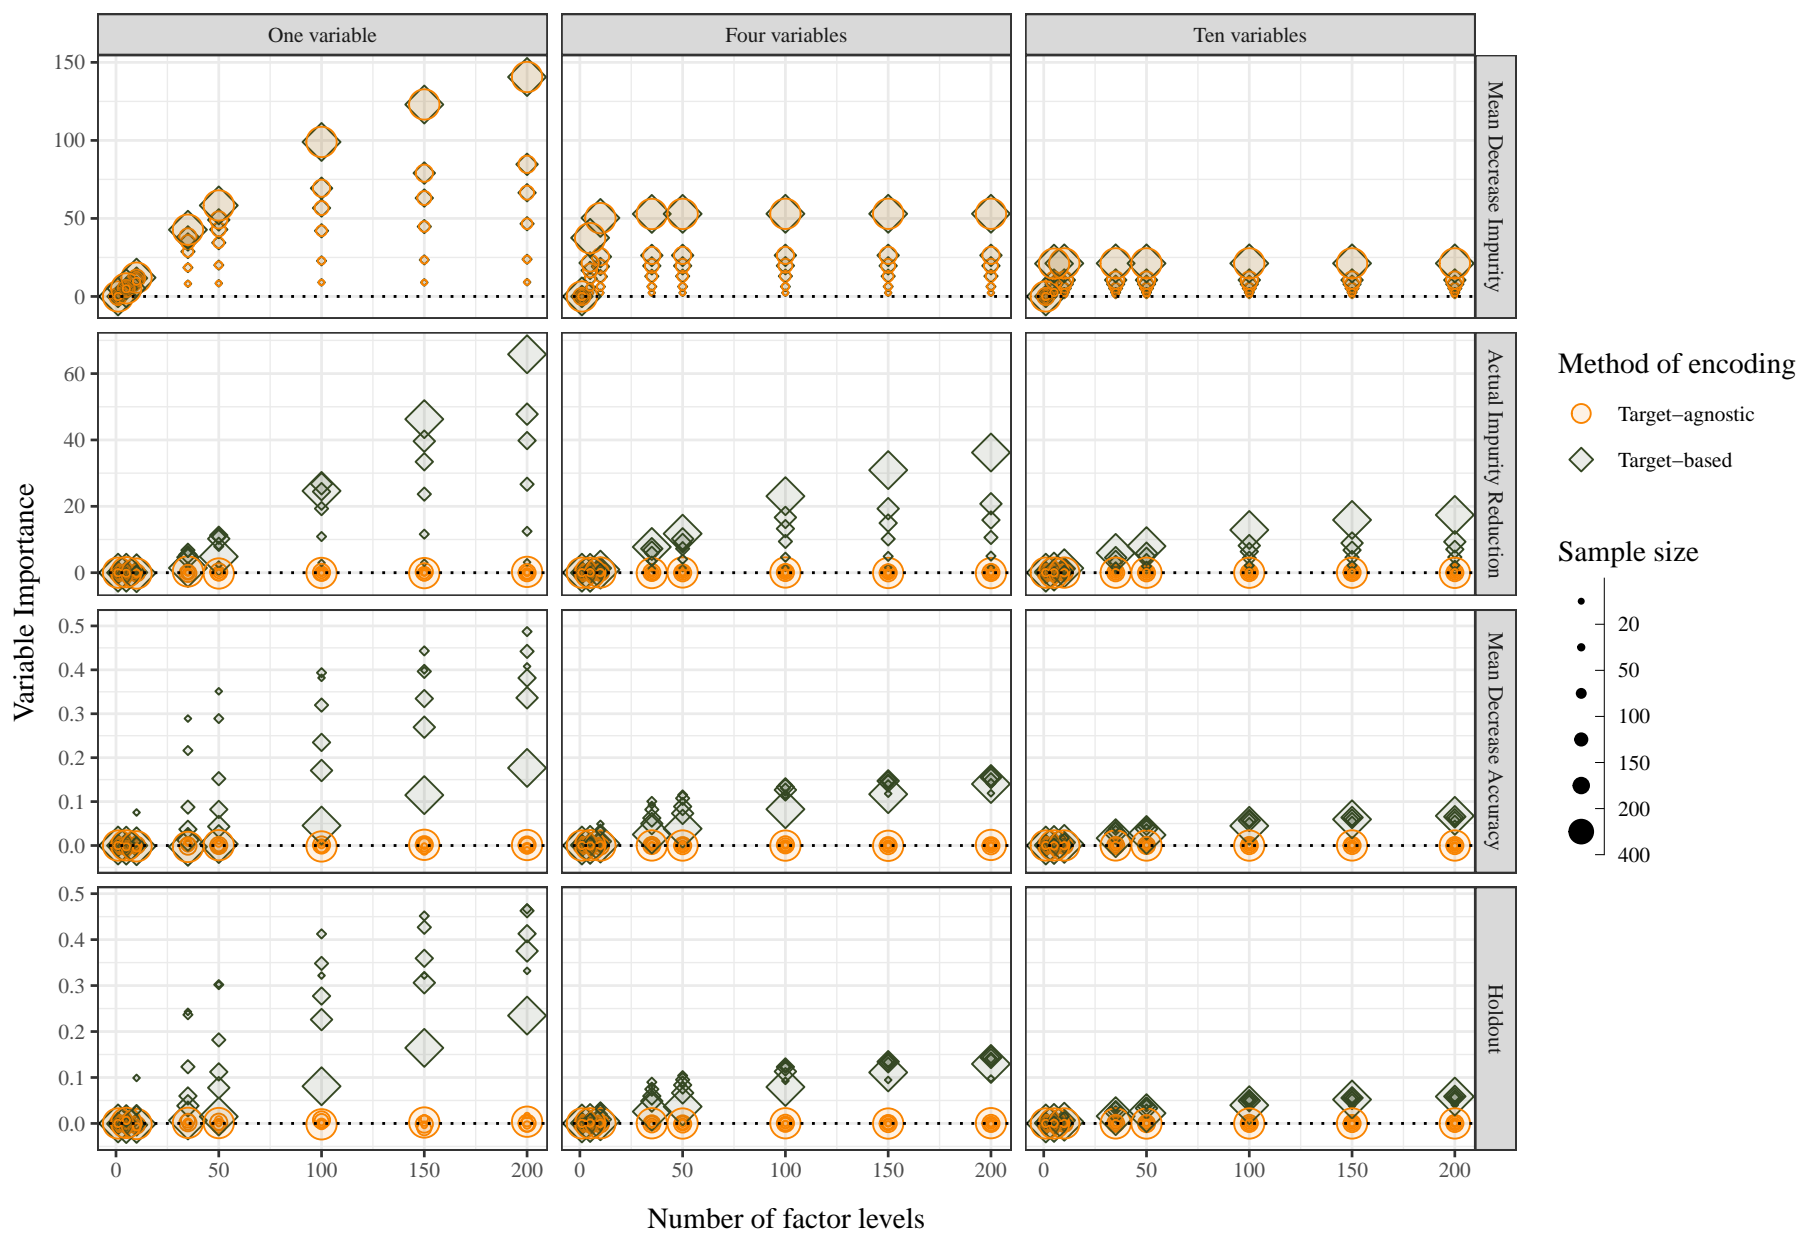

Supplement: supp2.pdf [file supp2.pdf]
